# Supplementary material for: A PD‐1highCD4 + T Cell Population With a Cytotoxic Phenotype is Associated With Interstitial Lung Disease in Systemic Sclerosis
Source: PubMed Central journal article supplement — ACR Open Rheumatol. 2024 May 3;6(7):429–39. doi: 10.1002/acr2.11671 (PMC11246828; doi:10.1002/acr2.11671), 2024-05-03
Supplement: ACR2-6-429-s002.pdf [file ACR2-6-429-s002.pdf]

| <b>Target</b> | <b>Clone</b> | <b>Metal</b> |
|---------------|--------------|--------------|
| <b>CD20</b>   | 2H7          | 113In        |
| <b>CD3</b>    | UCHT1        | 115In        |
| <b>CCR6</b>   | G034E3       | 141Pr        |
| <b>CD57</b>   | HCD57        | 142Nd        |
| <b>CD123</b>  | 6H6          | 143Nd        |
| <b>GraB</b>   | GB11         | 144Nd        |
| <b>CRTH2</b>  | BM16         | 145Nd        |
| <b>CD8a</b>   | RPA T8       | 146Nd        |
| <b>CD45RO</b> | UCHL1        | 147Sm        |
| <b>CD28</b>   | CD28.2       | 148Nd        |
| <b>Grak</b>   | GM26E7       | 149Sm        |
| <b>CD11c</b>  | Bu15         | 150Nd        |
| <b>ICOS</b>   | C398.4A      | 151Eu        |
| <b>CD14</b>   | M5E2         | 152Sm        |
| <b>CCR2</b>   | K036C2       | 153Eu        |
| <b>TIGIT</b>  | MBSA43       | 154Sm        |
| <b>CD4</b>    | RPA T4       | 155Gd        |
| <b>CD73</b>   | AD2          | 156Gd        |
| <b>CD16</b>   | 3G8          | 157Gd        |
| <b>CD27</b>   | L128         | 158Gd        |
| <b>CCR7</b>   | G043H7       | 159Tb        |
| <b>CXCR6</b>  | K041E5       | 160Gd        |
| <b>T-bet</b>  | 4B10         | 161Dy        |
| <b>FoxP3</b>  | PCH101       | 162Dy        |
| <b>CXCR3</b>  | G025H7       | 163Dy        |
| <b>CXCR5</b>  | J252D4       | 164Dy        |
| <b>CD127</b>  | TX31         | 165Ho        |
| <b>GATA3</b>  | TWAJ         | 166Er        |
| <b>CD38</b>   | HTA125       | 167Er        |
| <b>CCR9</b>   | L053E8       | 168Er        |
| <b>TCRgd</b>  | B1           | 169Tm        |
| <b>CX3CR1</b> | 2A9-1        | 170Er        |
| <b>CCR5</b>   | NP6G4        | 171Yb        |
| <b>Ki67</b>   | B56          | 172Yb        |
| <b>CD25</b>   | M-A251       | 173Yb        |
| <b>CCR10</b>  | 6588-5       | 174Yb        |
| <b>PD-1</b>   | EH12.2H7     | 175Lu        |
| <b>CD56</b>   | R19760       | 176Yb        |
| <b>HLA-DR</b> | BVD2-23B6    | 209Bi        |

**Supplementary Table 1:** Markers used for mass cytometry analyses.

| Signature    | Genes                                                                                                                                                                                                                                                                                                                                                                                                                                                                                                                                                                                                                                                                                                                                                                                                                                                                                                                                                                                                                                                                                                                                                                                                                                                                                                                                                                                                                                                                                                                                                                                                                                                                                             |
|--------------|---------------------------------------------------------------------------------------------------------------------------------------------------------------------------------------------------------------------------------------------------------------------------------------------------------------------------------------------------------------------------------------------------------------------------------------------------------------------------------------------------------------------------------------------------------------------------------------------------------------------------------------------------------------------------------------------------------------------------------------------------------------------------------------------------------------------------------------------------------------------------------------------------------------------------------------------------------------------------------------------------------------------------------------------------------------------------------------------------------------------------------------------------------------------------------------------------------------------------------------------------------------------------------------------------------------------------------------------------------------------------------------------------------------------------------------------------------------------------------------------------------------------------------------------------------------------------------------------------------------------------------------------------------------------------------------------------|
| Cytotoxicity | GZMA, GZMB, GZMH, PRF1, NKG7, GNLY, CD40LG, KLRG1, KLRB1, ITGAL                                                                                                                                                                                                                                                                                                                                                                                                                                                                                                                                                                                                                                                                                                                                                                                                                                                                                                                                                                                                                                                                                                                                                                                                                                                                                                                                                                                                                                                                                                                                                                                                                                   |
| Tfh          | CXCR5, CXCL13, TOX2, ICA1, PDCD1, FAM43A, SCGB3A1, ASCL2, CHI3L2, CDK5R1, CEBPA, GNG4, CXXC5, GFOD1, TIGIT, POU2AF1, ATP9A, KIAA1671, SGPP2, BCL6, EGR2, LGMN, CD79A, KIAA1324, NFATC1, MYL6B, BCAT1, CTLA4, KCNK5, CTTN, LAG3, ICOS, THADA, LHFPL2, MAF, ID3, TRIB1, BTLA, SLC9A9, CAV1, SH2D1A, SH3TC1, MAGEH1, ST8SIA1, IKZF3, IGFBP4, NMB, TBC1D4, TRIM8, CCDC50, MYH10, PTPN11, FAM46C, ITM2A, FABP5, SPSB1, ODC1, MERTK, FBLN7, SERTAD2, TOX, CORO1B, SCD, SHISA2, RAB27A, FAM167A, STX11, LRRC1, PTTG1, CD200, KIAA0101, LIMS1, SLC7A5, PON2, FKBP5, NAB1, PFKFB3, DUSP6, AIM2, GADD45G, COL6A3, FAM179A, PHGDH, NUDT7, RNF19A, DUSP2, PAQR4, PPP1CC, SLC25A46, CARHSP1, HES6, H1FO, SRGN, CDCA7, SIRPG, MT1E, CD38, ASB2, KIFC1, RDH10, LRMP, DDIT4, P2RY11, NUCB2, TMEM2, ACTA2, SERPINE2, CASP9, INPP1, SGCE, MTUS1, GRAMD3, AFF3, NCALD, ANKRD55, AGMAT, TRIM32, CPA5, MAPK6, NDFIP2, UBE2E3, SEPN1, LIMS2, NETO2, GLCCI1, FAAH2, RPL39L, SSH2, PHACTR2, ERMP1, TNFRSF18, ANKS1B, SOCS1, FEN1, PYHIN1, PTPN13, QPRT, ACTN1, MYO5A, POMT1, LAT, SYT11, BCAS4, INSIG1, WSB2, RAB11FIP1, NR3C1, TRAF3IP2, GINS2, RFC5, FAM110A, RILPL2, IL2RB, ASAP1, GK, TSPAN5, ALDH5A1, TIAM1, CBLB, CLINT1, SMPDL3A, SIPA1L2, JARID2, ORMDL3, TSHR, BAZ2B, ATP6V1D, ZFPM1, TM2D3, RAB37, GPR19, F2R, SRPK2, BIK, FBXO33, MAPKAPK3, PTPN2, LBH, PTPN7, UBE2G1, FHL2, TJP2, IFNAR2, VOPP1, IRF4, CDK6, HIF1A, P2RX5, CXCR4, TMEM99, FYN, DCUN1D3, BATF, CDT1, GF11, ARHGAP10, PRKCZ, IL6R, LTA, KPNA2, PPP2R5C, PPP1R16B, VWA5A, FAM160B1, TMEM64, MBOAT1, FAM134B, TP53INP1, RYR1, AKAP13, PCNA, HIST1H2BD, HES4, NAP1L4, PLCH2, GAPDH, HECW2, TRIB2, SAT1, SLC29A1, ZFP91, RACGAP1, MCM2, SFXN1, IL21 |

**Supplementary Table 2: Genes used for Cytotoxicity and Tfh Gene Enrichment Scores.** Genes comprising the cytotoxicity and Tfh gene signatures were derived from Hashimoto *et al.* 2019 and Locci *et al.* 2013, respectively.

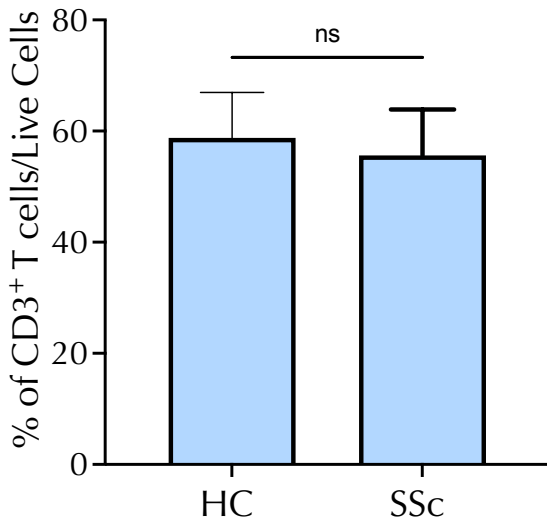

**Supplementary Figure 1: Percentage of total T cells are similar in healthy controls and SSc patients.** Quantification of CD3+ T cells in patients with SSc (n = 82) compared with healthy controls (n = 18) using mass cytometry data. ns, non-significant.

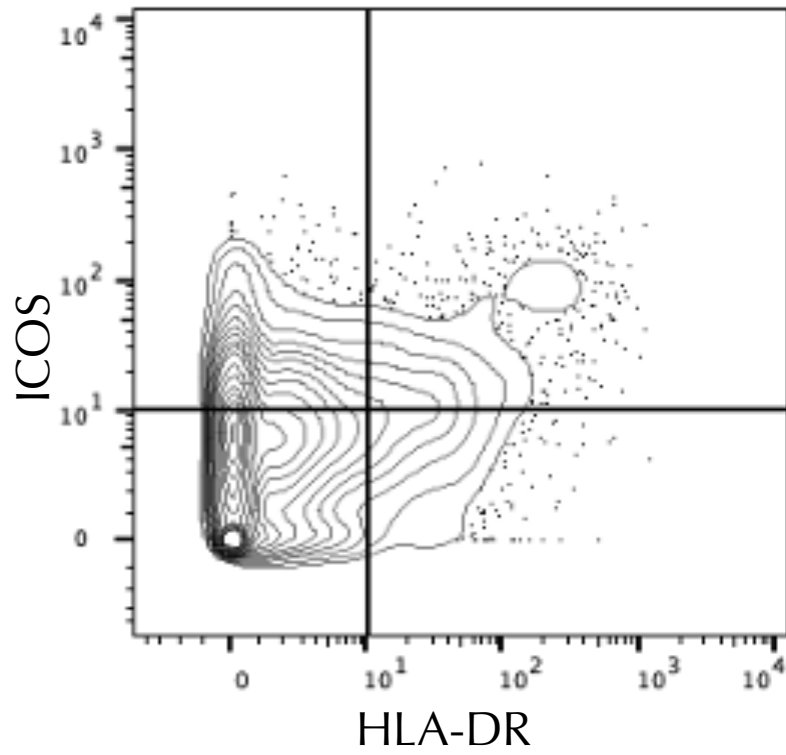

**Supplementary Figure 2. ICOS expression is a continuum in PD-1hi CXCR5- HLA-DR+ CD4 T cells.** Biaxial plot of ICOS expression in PD-1hi CXCR5- CD4 T cells.

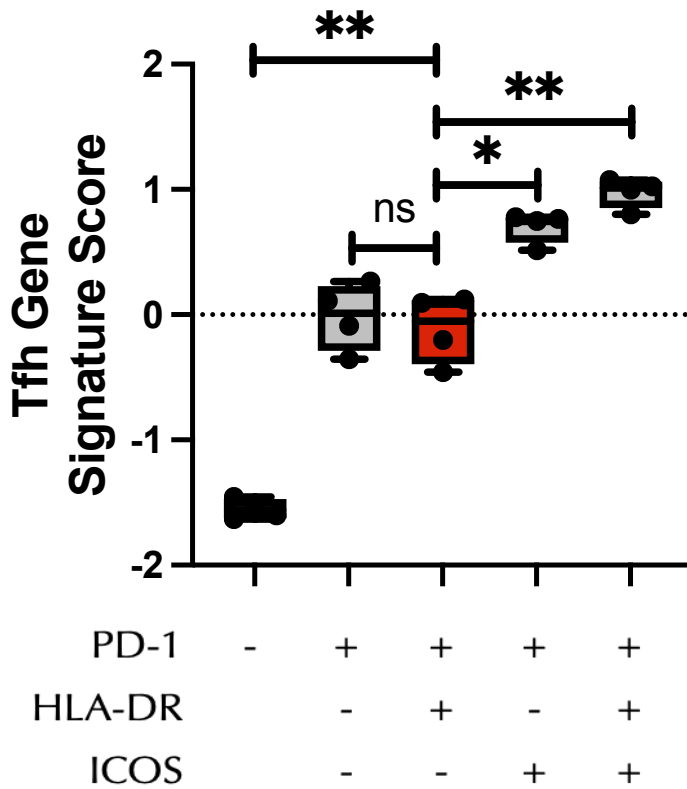

**Supplementary Figure 3: PD-1<sup>hi</sup>CXCR5<sup>-</sup>HLA-DR<sup>+</sup>ICOS<sup>-</sup> CD4 T cells show a lower Tfh score associated with a T helper phenotype compared with other PD-1<sup>hi</sup>CXCR5<sup>-</sup> CD4 T cell populations.** The Tfh gene signature score is depicted for the CD4 T cell subsets derived from bulk RNA sequencing data of CXCR5<sup>-</sup> CD4 T cell subsets in RA patients as depicted in Figure 3B. Subsets are defined by expression of PD-1, HLA-DR, and ICOS as noted. Paired t-test comparisons are shown. \*p<0.05; \*\*p<0.01; ns, non-significant.

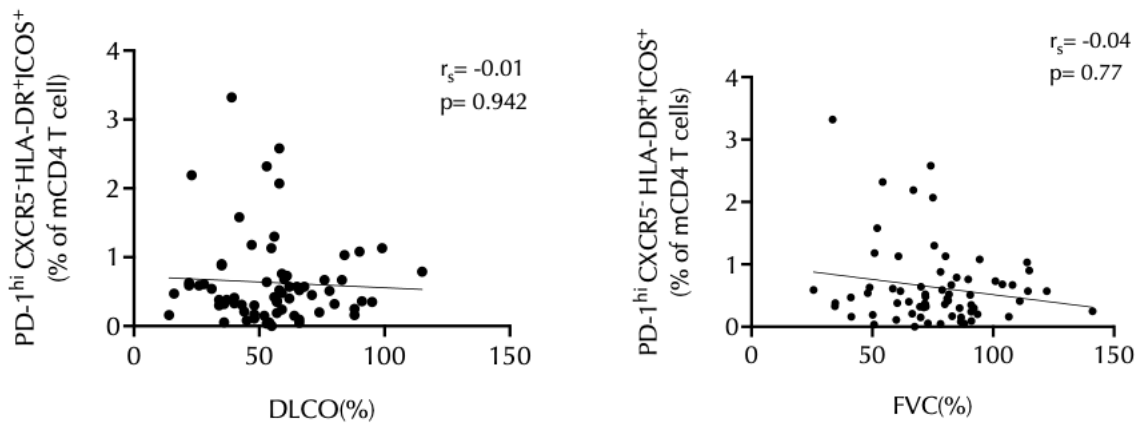

**Supplementary Figure 4. PD-1<sup>hi</sup> CXCR5<sup>-</sup> HLA-DR<sup>+</sup> ICOS<sup>+</sup> CD4 T cell frequencies are not significantly correlated with DLCO or FVC.** Frequencies of PD-1<sup>hi</sup> CXCR5<sup>-</sup> HLA-DR<sup>+</sup> ICOS<sup>+</sup> CD4 T cell subset correlated with DLCO(%) shows  $r = .01$ ,  $p = 0.942$  and correlation with FVC(%) shows  $r = -0.04$ ,  $p = 0.77$ .
